# Supplementary material for: Hydrogen bonding in dimers of tritolyl and tritosylurea derivatives of triphenylmethanes
Source: Royal Society of Chemistry journal article supplement (doi:10.1039/b609707c), 2006-01-01
Supplement: b609707c.pdf [file b609707c.pdf]

Supporting Information Available.

## Hydrogen bonding in dimers of tritolyl and tritosylurea derivatives of triphenylmethanes

Yuliya Rudzevich, Valentyn Rudzevich, Dieter Schollmeyer, Iris Thondorf and Volker Böhmer

### TABLE OF CONTENTS

|                                                                                                      |     |
|------------------------------------------------------------------------------------------------------|-----|
| <b>Figure S1.</b> $^1\text{H}$ NMR spectrum of <b>3a</b> in $\text{DMSO-d}_6$ .....                  | S2  |
| <b>Figure S2.</b> $^1\text{H}$ NMR spectrum of <b>3a</b> in $\text{CDCl}_3$ .....                    | S3  |
| <b>Figure S3.</b> $^1\text{H}$ NMR spectrum of <b>3b</b> in $\text{DMSO-d}_6$ .....                  | S4  |
| <b>Figure S4.</b> $^1\text{H}$ NMR spectrum of <b>3b</b> in $\text{CDCl}_3$ .....                    | S5  |
| <b>Figure S5.</b> $^1\text{H}$ NMR spectrum of <b>3c</b> in $\text{DMSO-d}_6$ .....                  | S6  |
| <b>Figure S6.</b> $^{31}\text{P}\{^1\text{H}\}$ NMR spectrum of <b>3c</b> in $\text{DMSO-d}_6$ ..... | S7  |
| <b>Figure S7.</b> $^1\text{H}$ NMR spectrum of <b>3d</b> in $\text{DMSO-d}_6$ .....                  | S8  |
| <b>Figure S8.</b> $^1\text{H}$ NMR spectrum of <b>3d</b> in $\text{CDCl}_3$ .....                    | S9  |
| <b>Figure S9.</b> $^1\text{H}$ NMR spectrum of <b>3e</b> in $\text{DMSO-d}_6$ .....                  | S10 |
| <b>Figure S10.</b> $^1\text{H}$ NMR spectrum of <b>3e</b> in $\text{CDCl}_3$ .....                   | S11 |

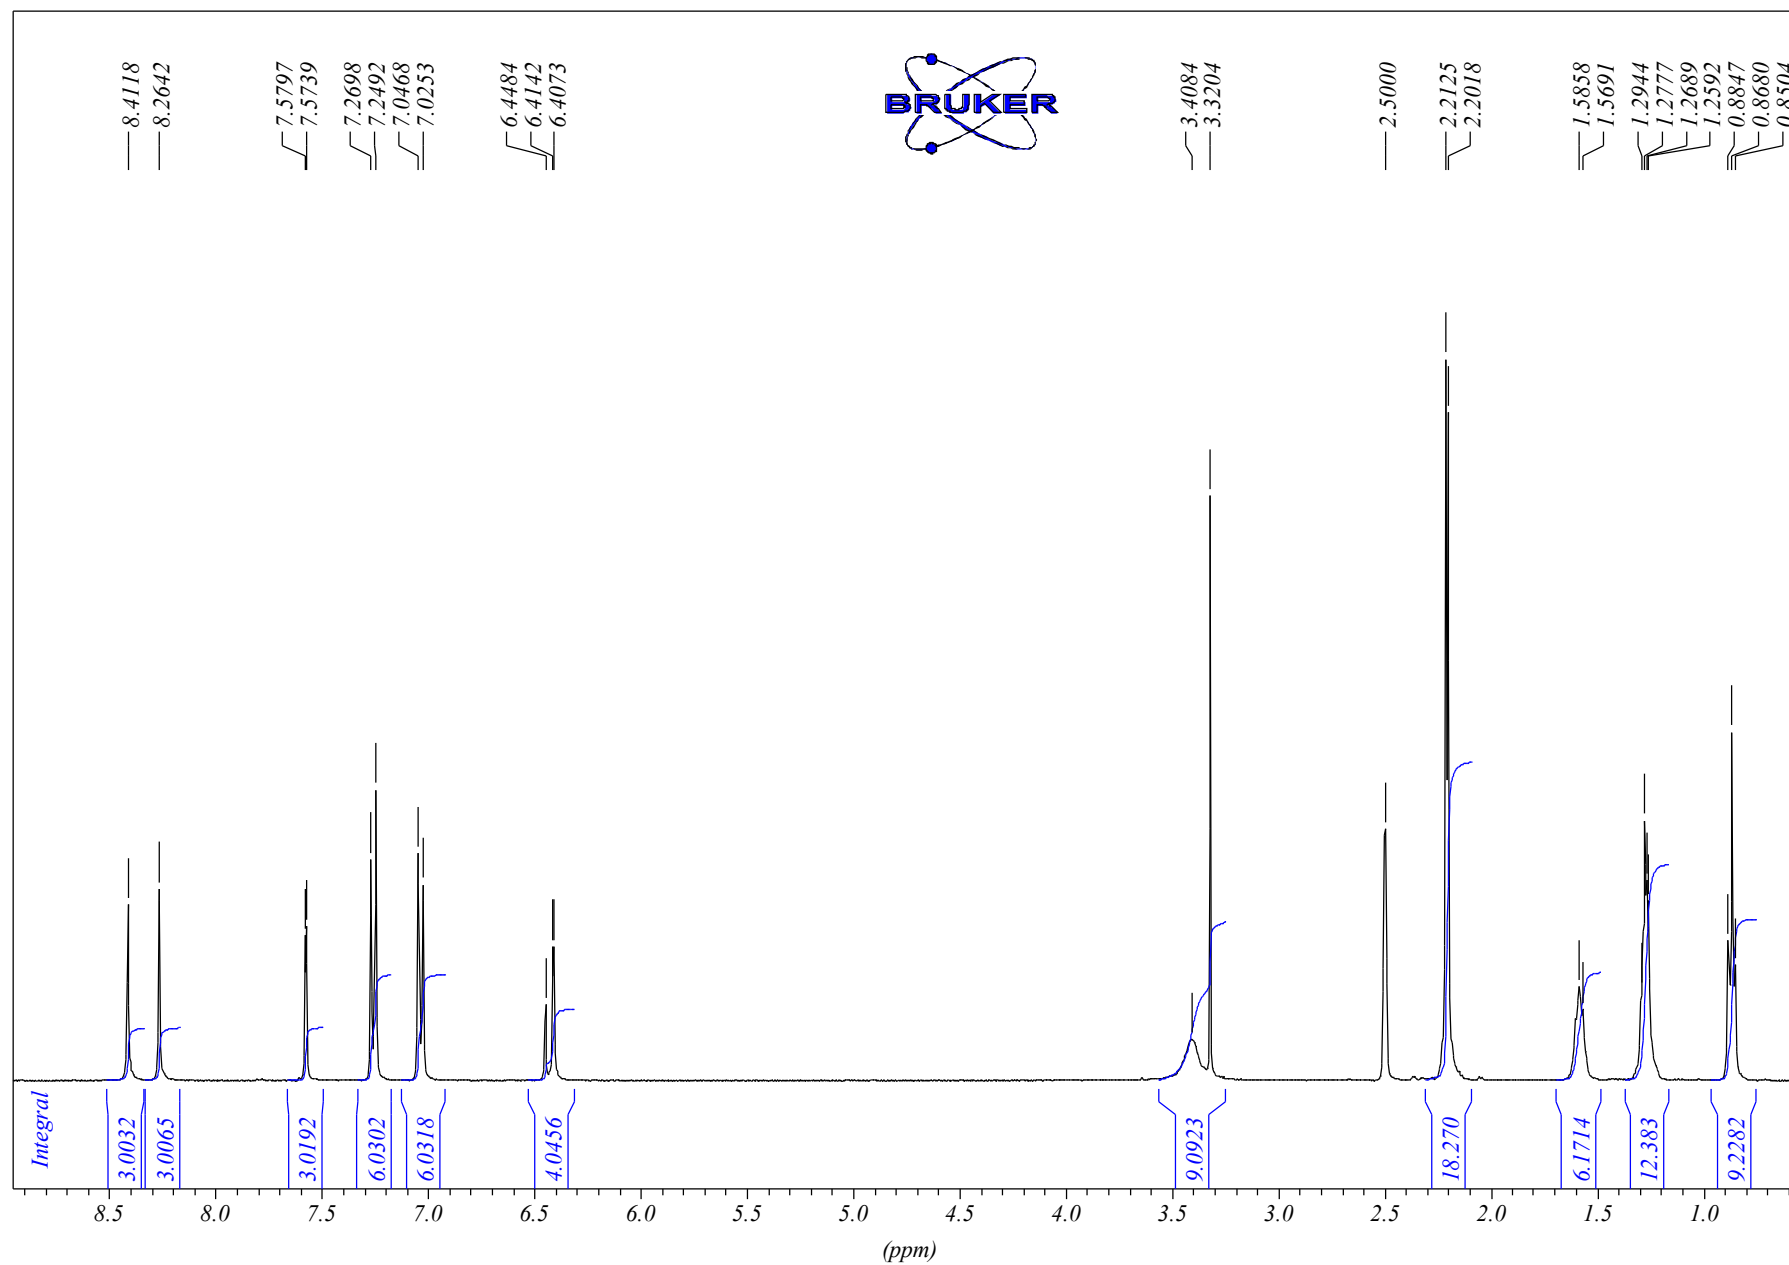

**Figure S1.** <sup>1</sup>H NMR spectrum of **3a** in DMSO-d<sub>6</sub>.

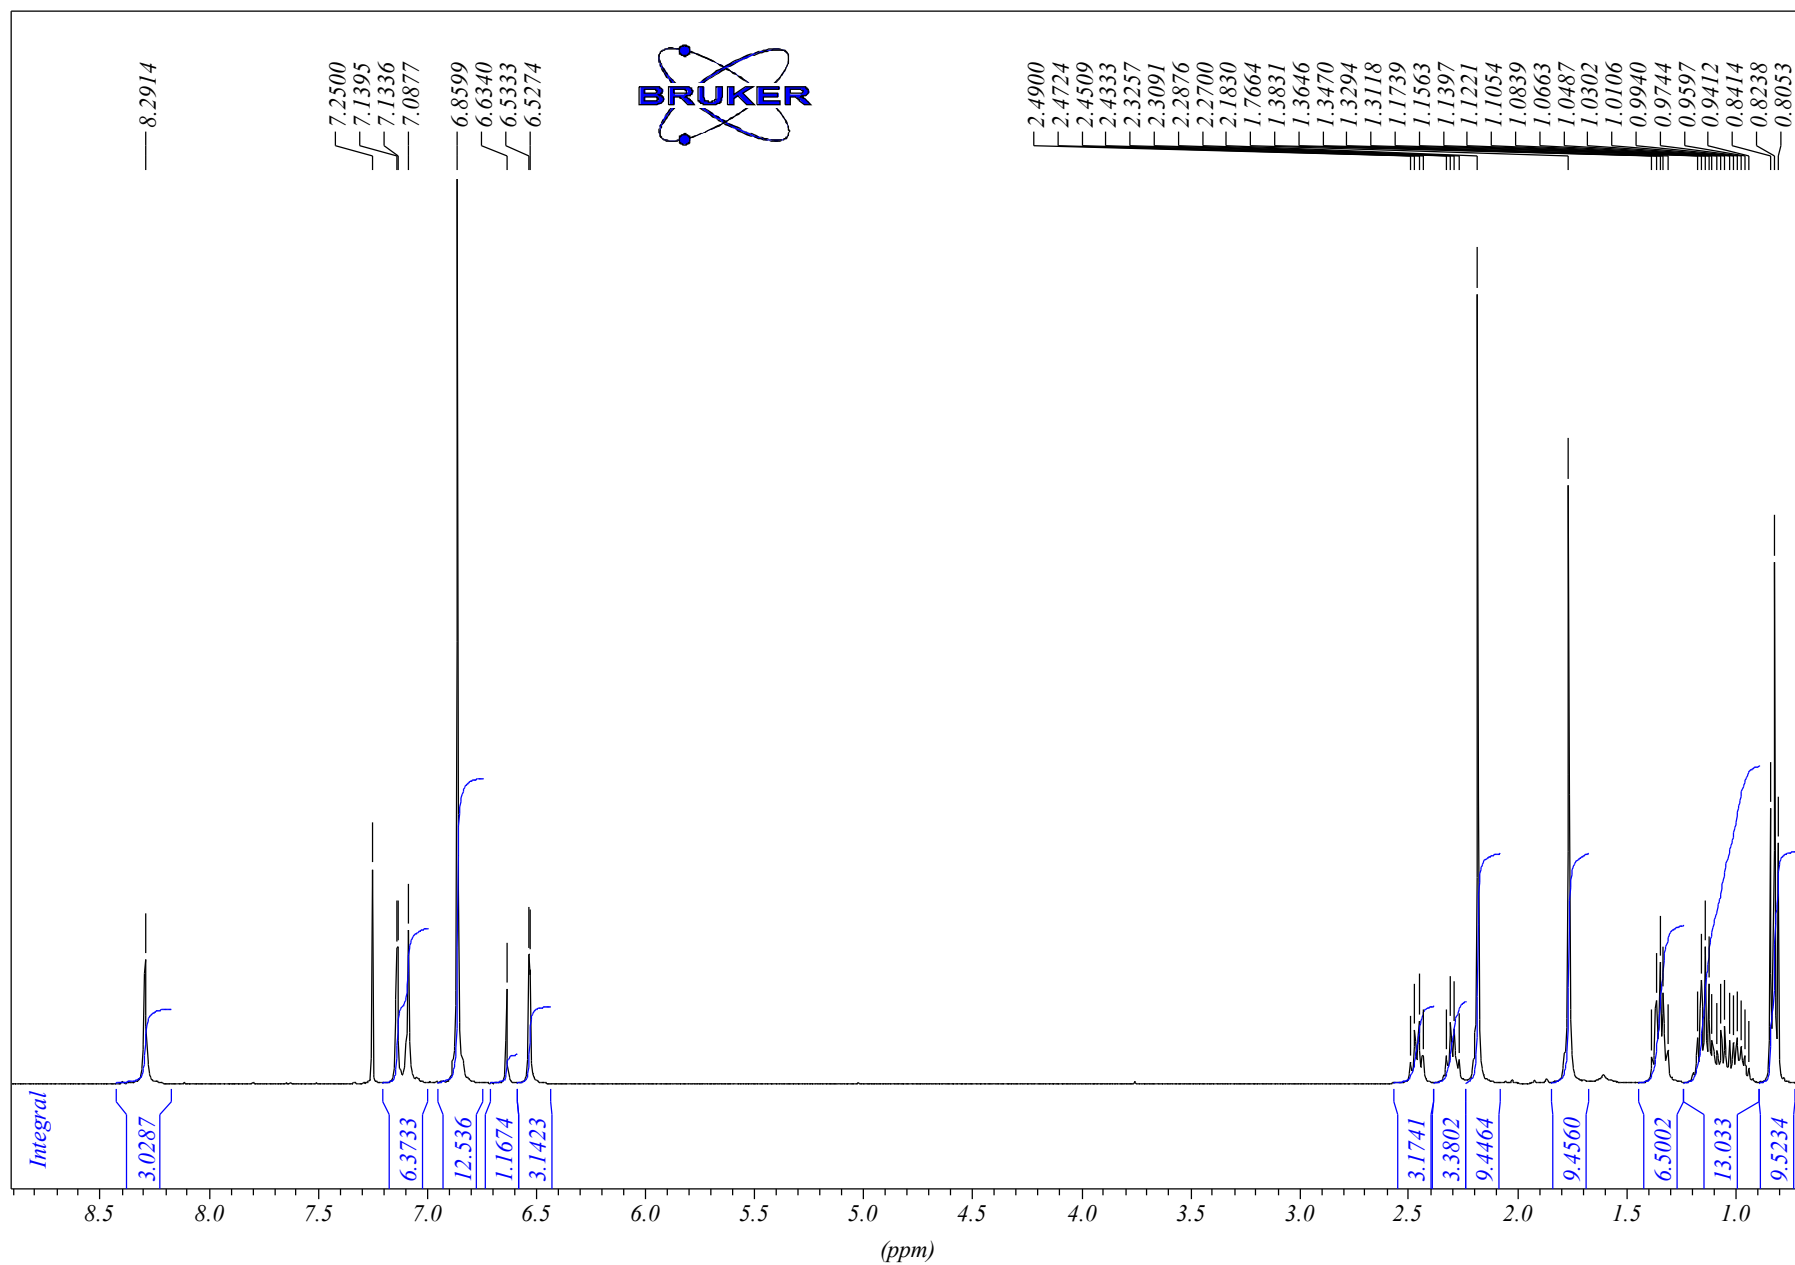

Figure S2.  $^1\text{H}$  NMR spectrum of **3a** in  $\text{CDCl}_3$ .

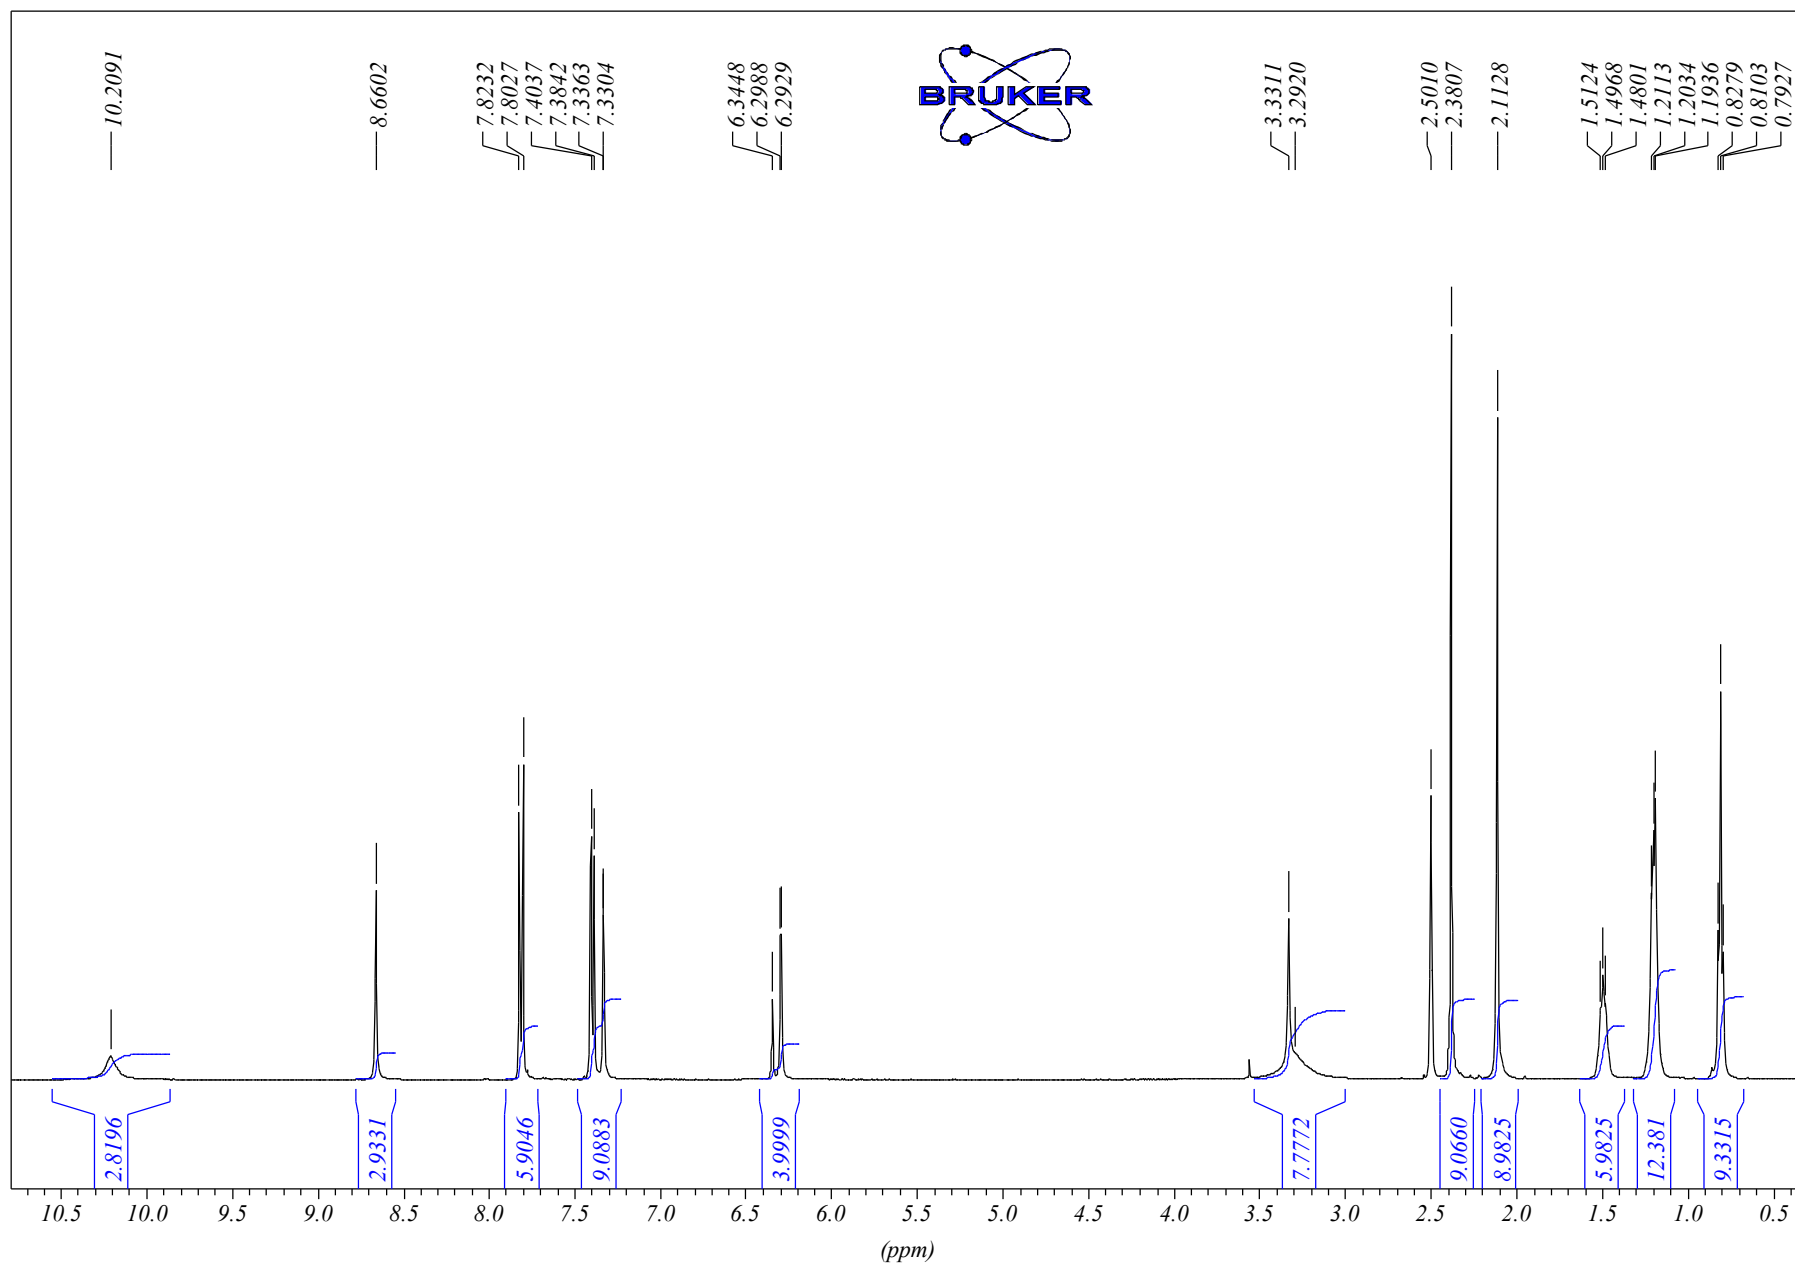

**Figure S3.** <sup>1</sup>H NMR spectrum of **3b** in DMSO-d<sub>6</sub>.

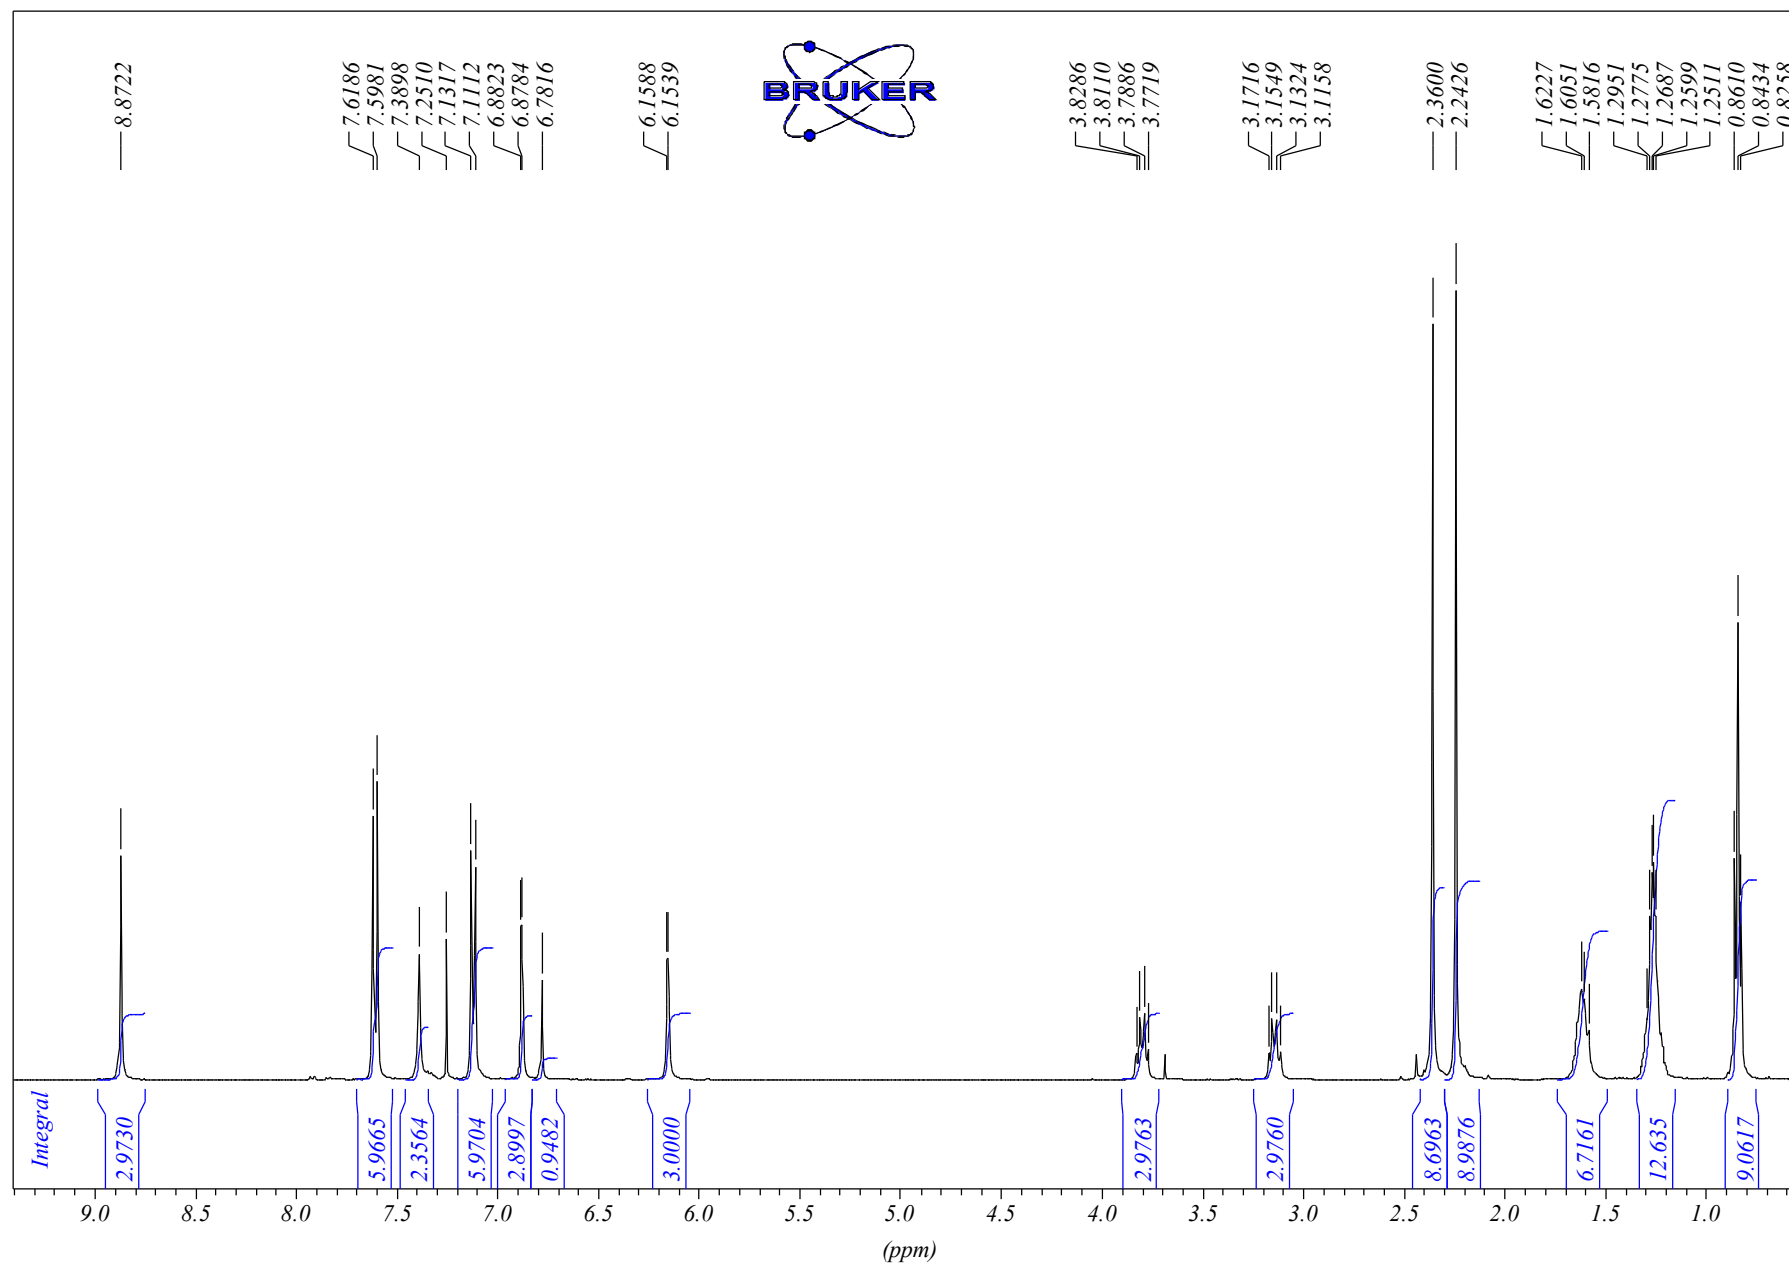

Figure S4.  $^1\text{H}$  NMR spectrum of **3b** in  $\text{CDCl}_3$ .

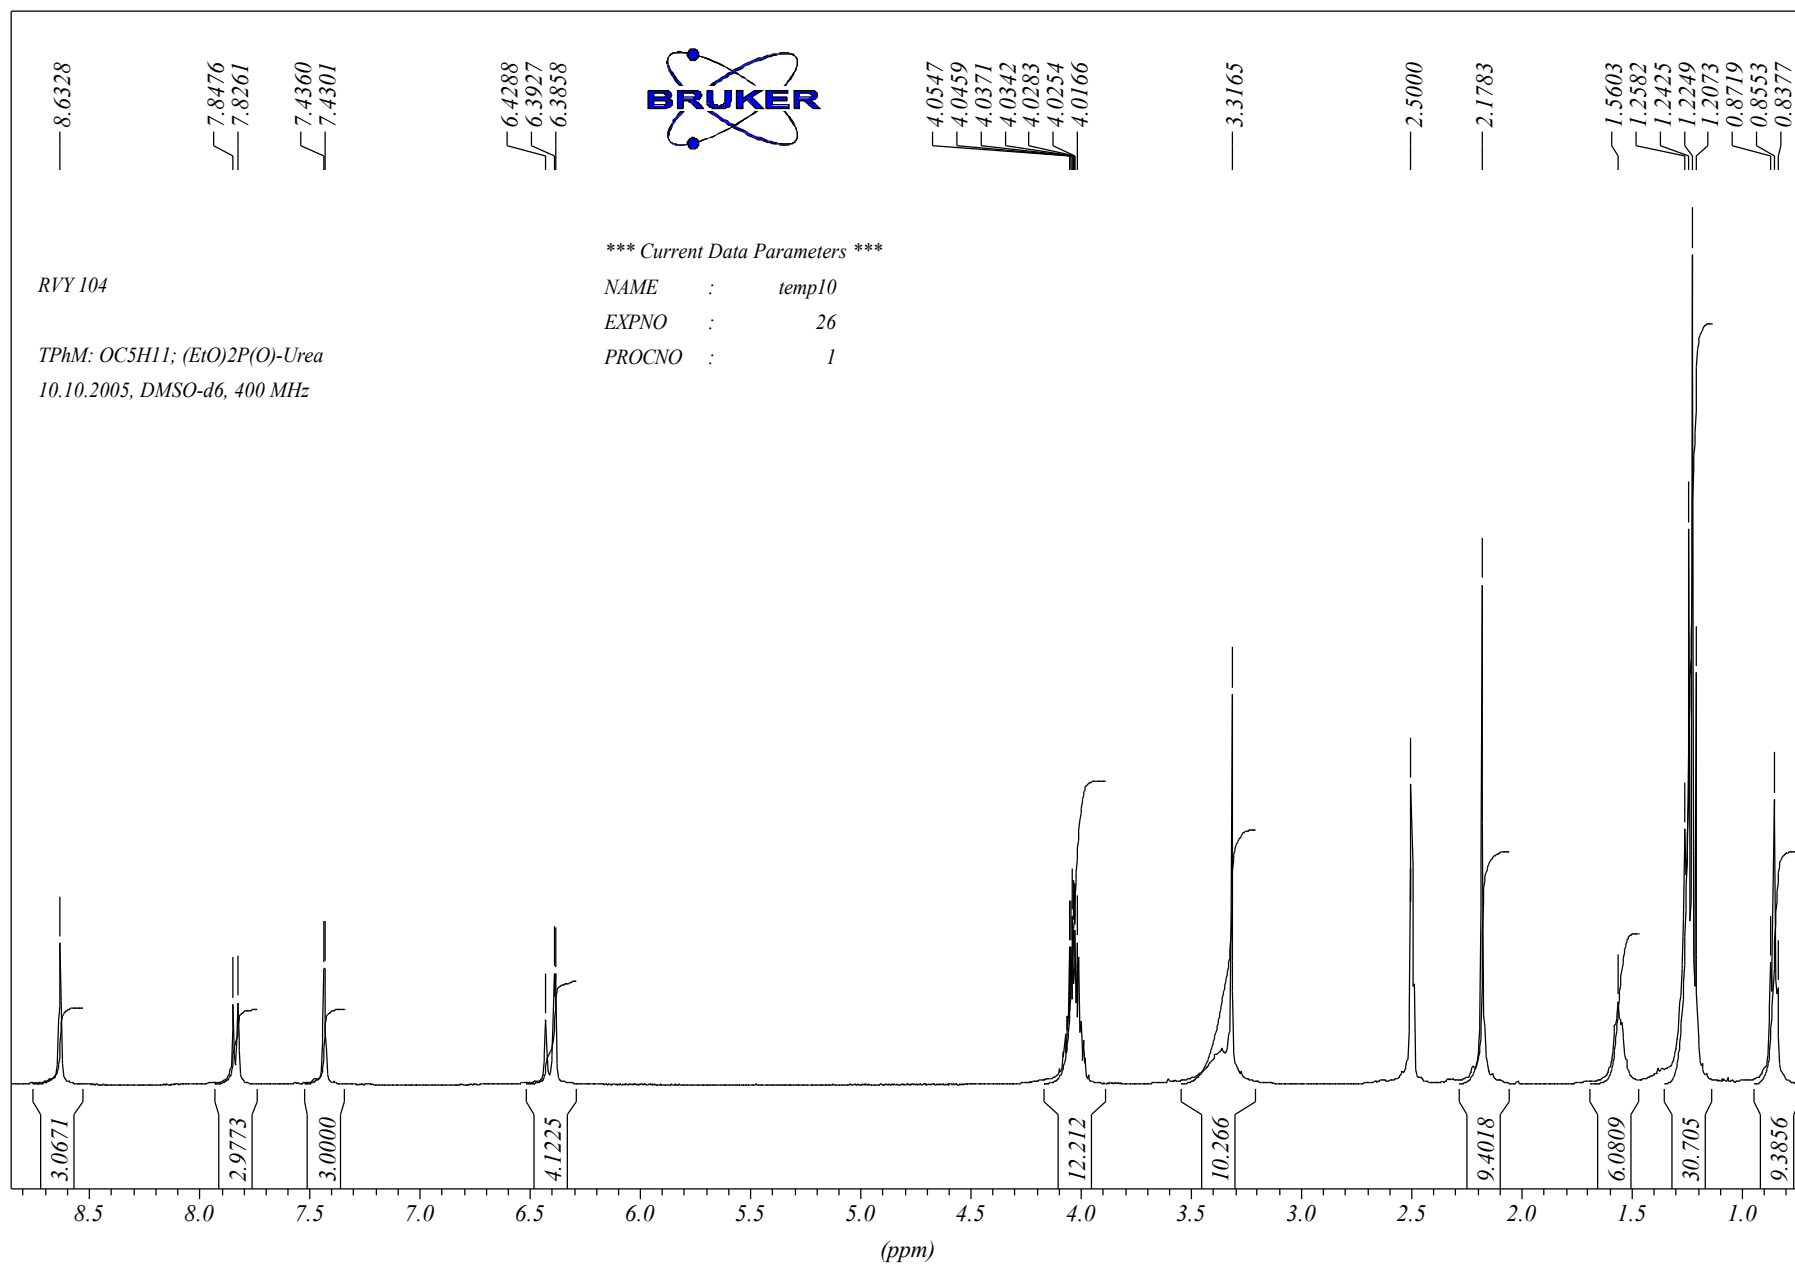

**Figure S5.**  $^1\text{H}$  NMR spectrum of **3c** in  $\text{DMSO-d}_6$ .

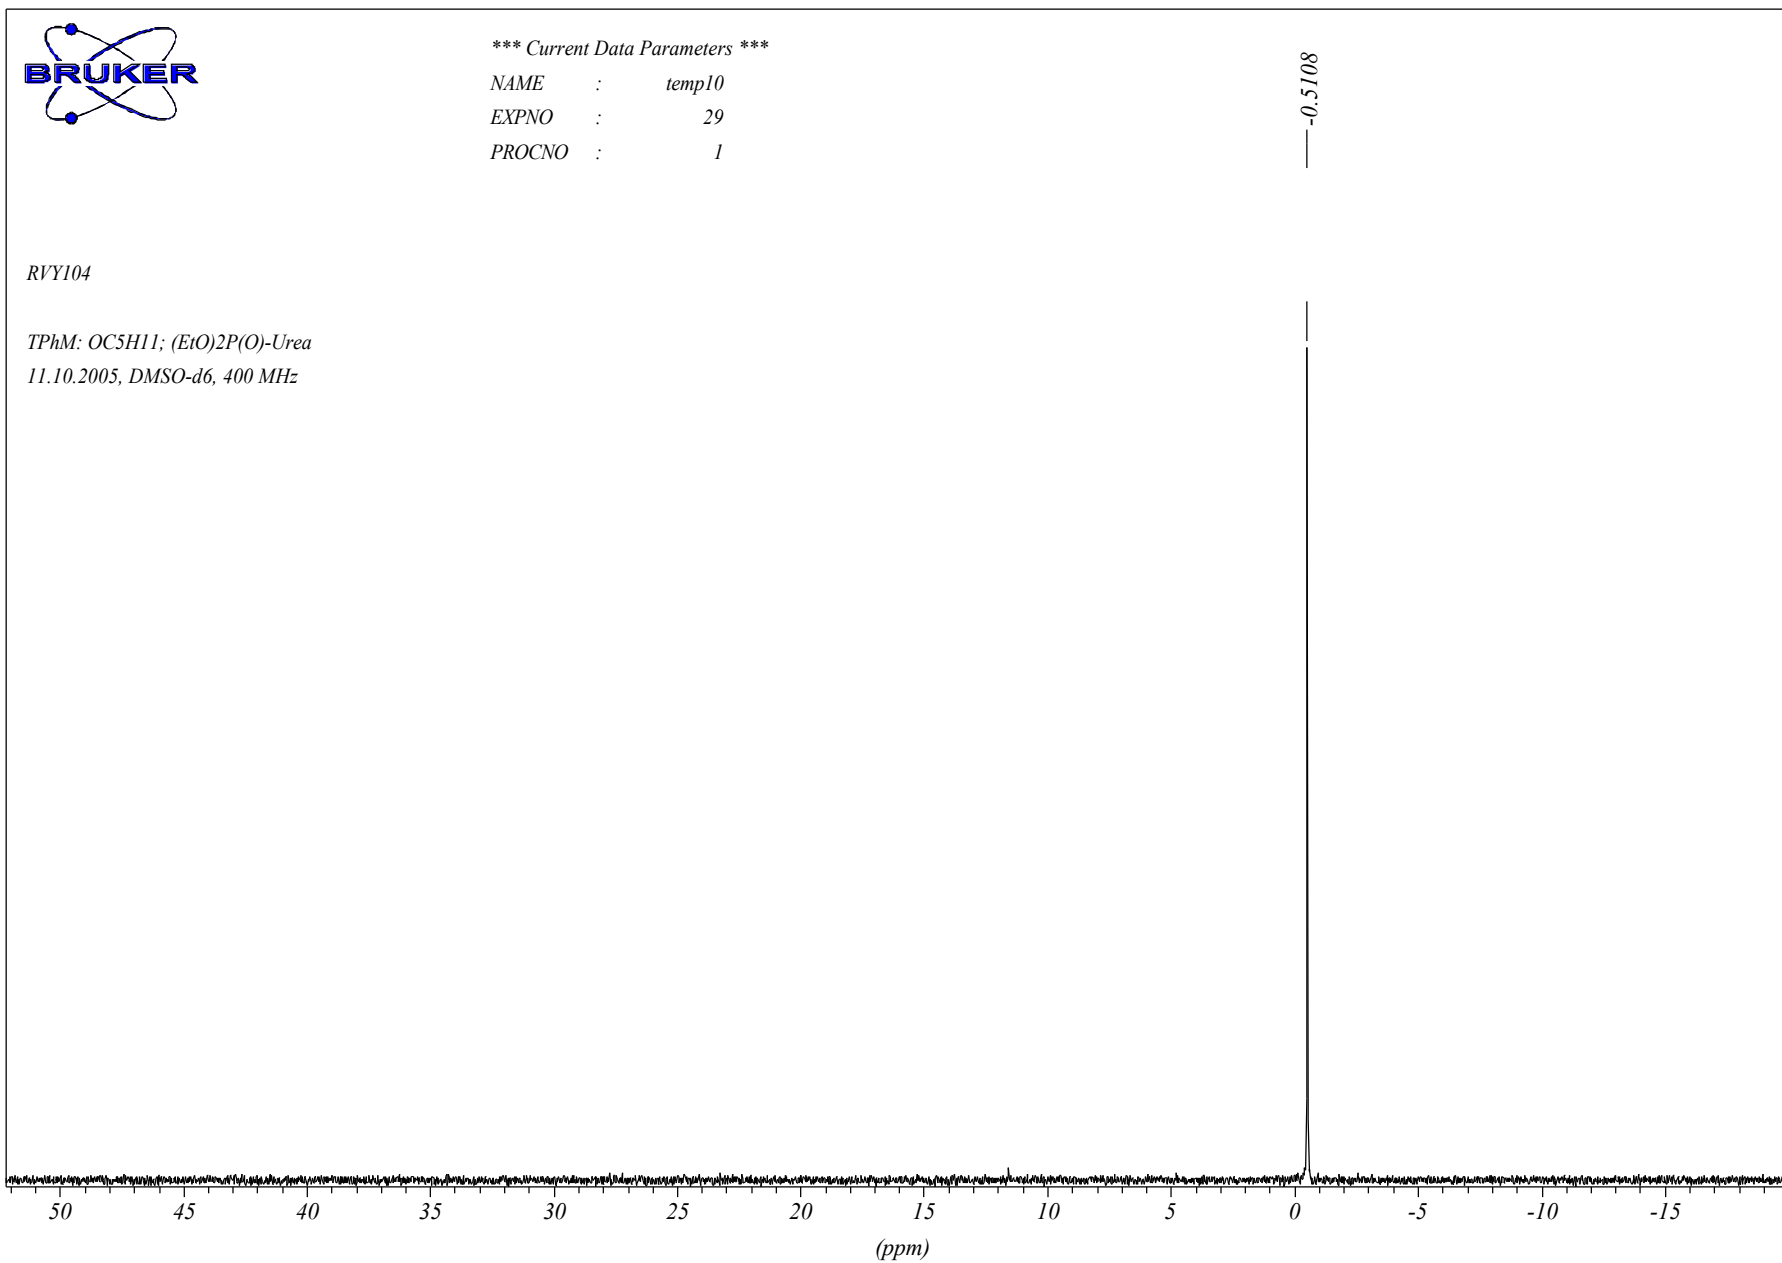

Figure S6.  $^{31}\text{P}\{^1\text{H}\}$  NMR spectrum of **3c** in DMSO- $\text{d}_6$ .

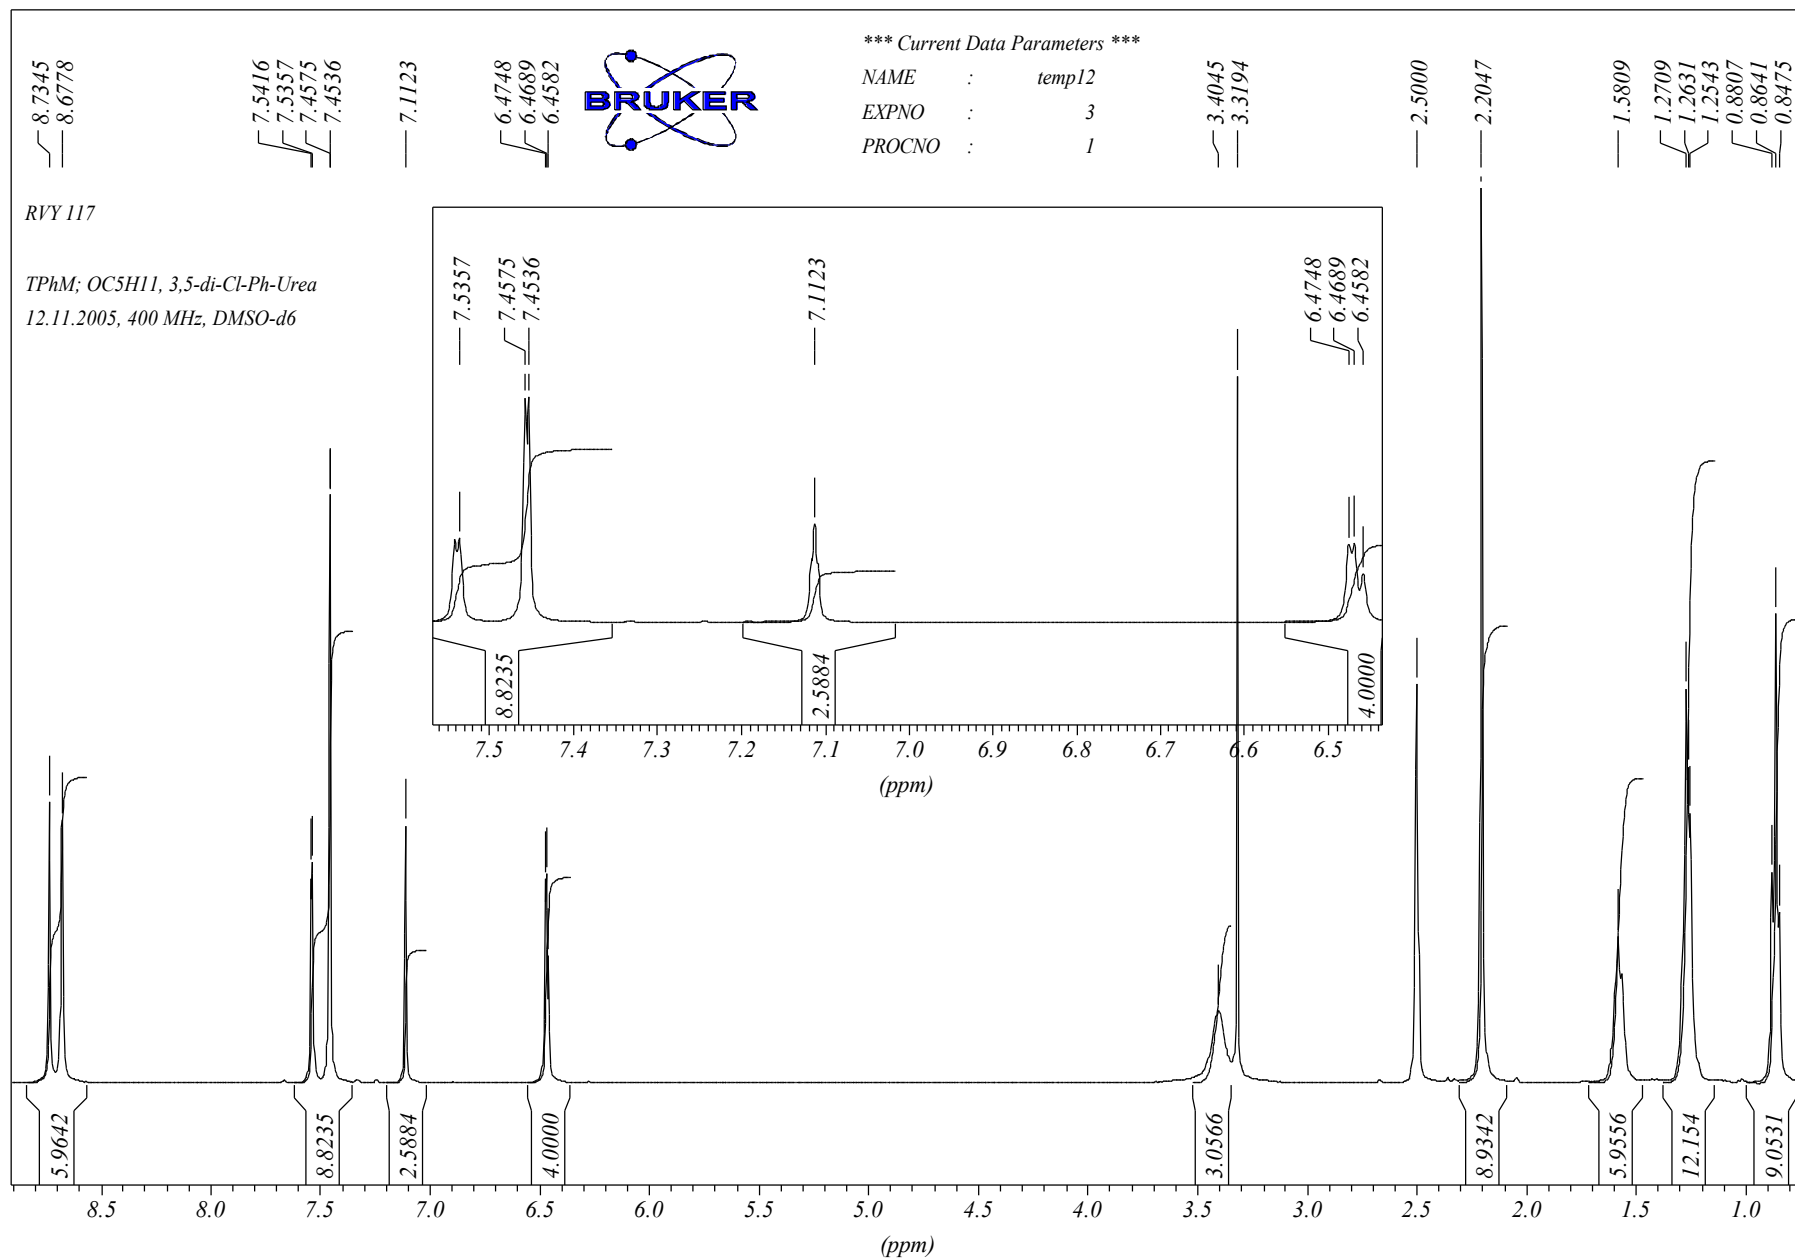

Figure S7. <sup>1</sup>H NMR spectrum of **3d** in DMSO-d<sub>6</sub>.



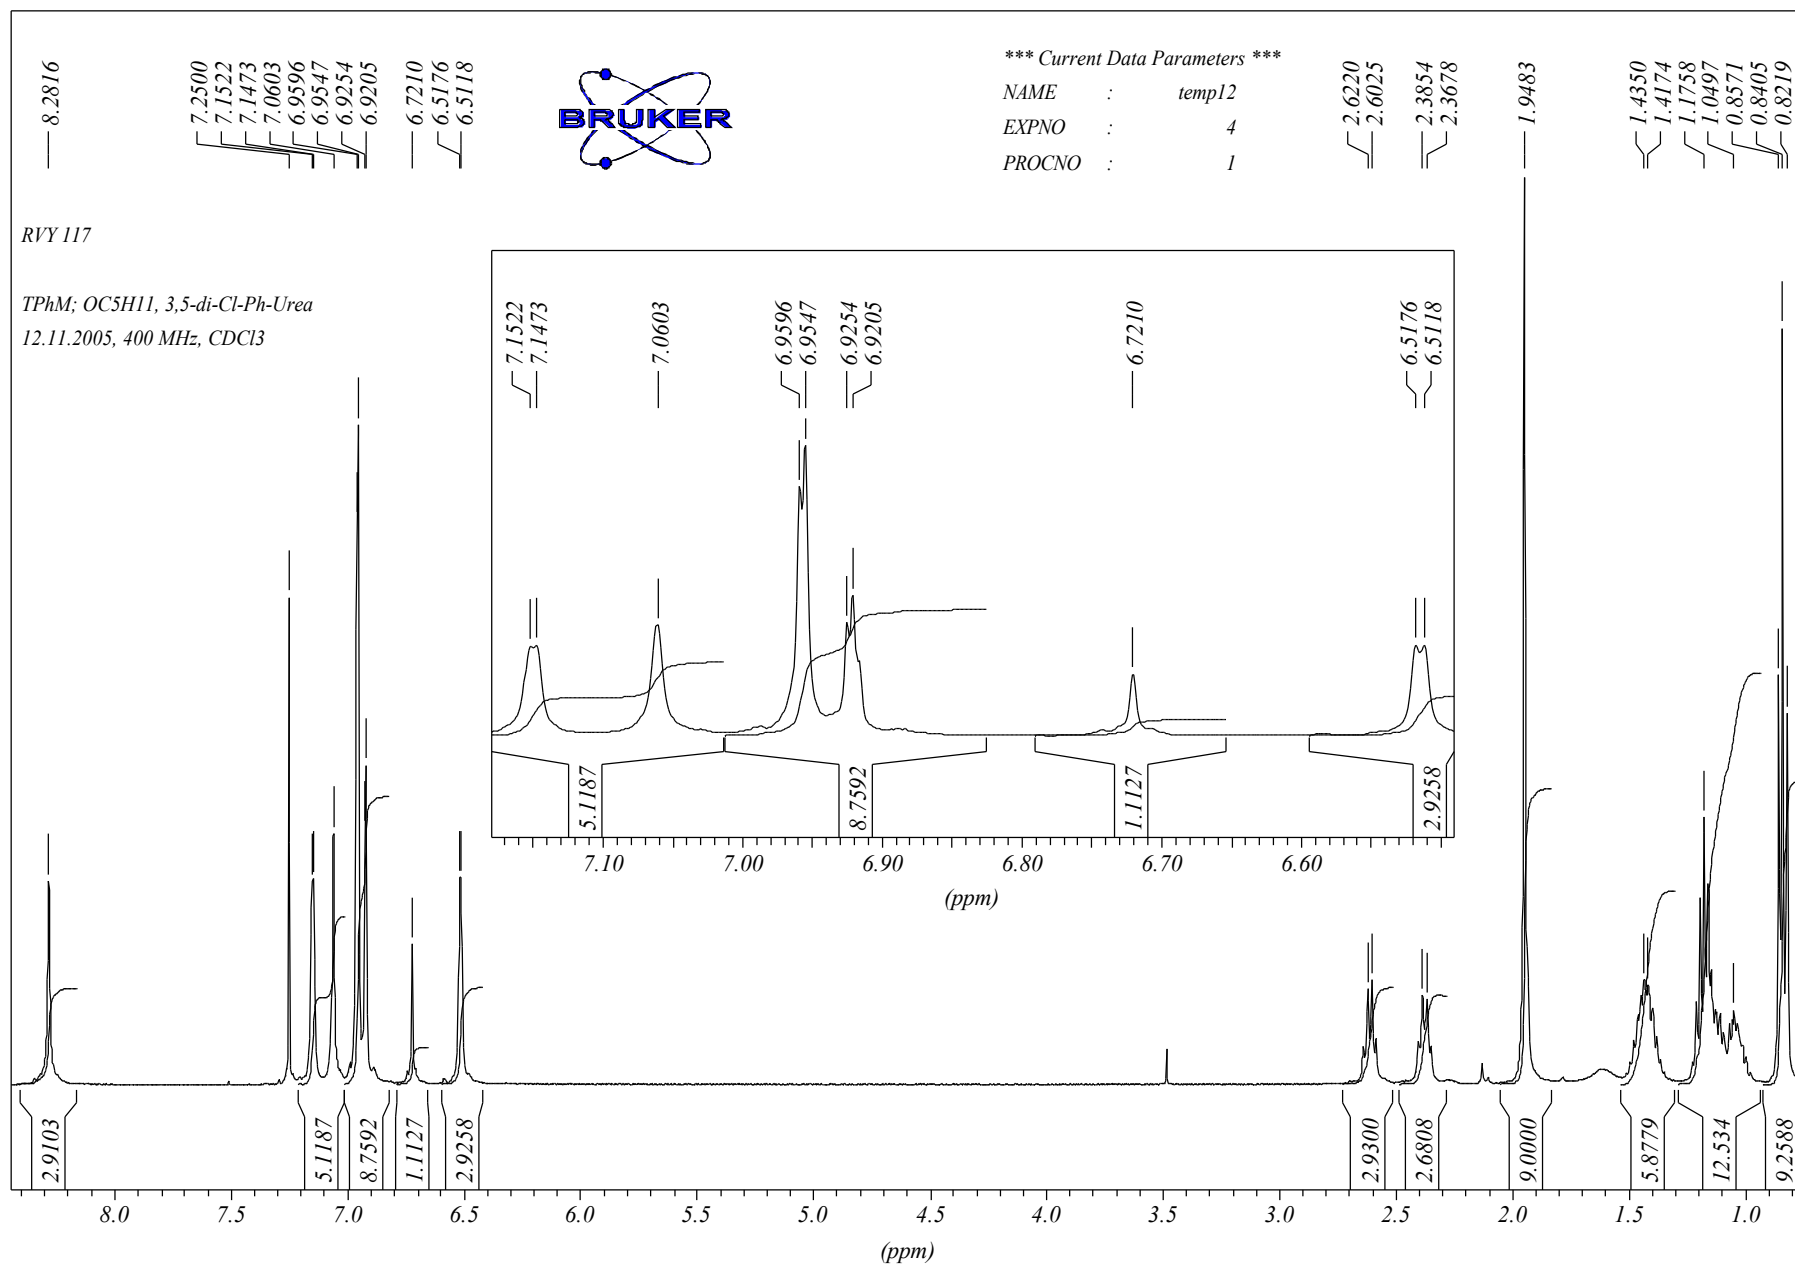

Figure S8. <sup>1</sup>H NMR spectrum of **3d** in CDCl<sub>3</sub>.

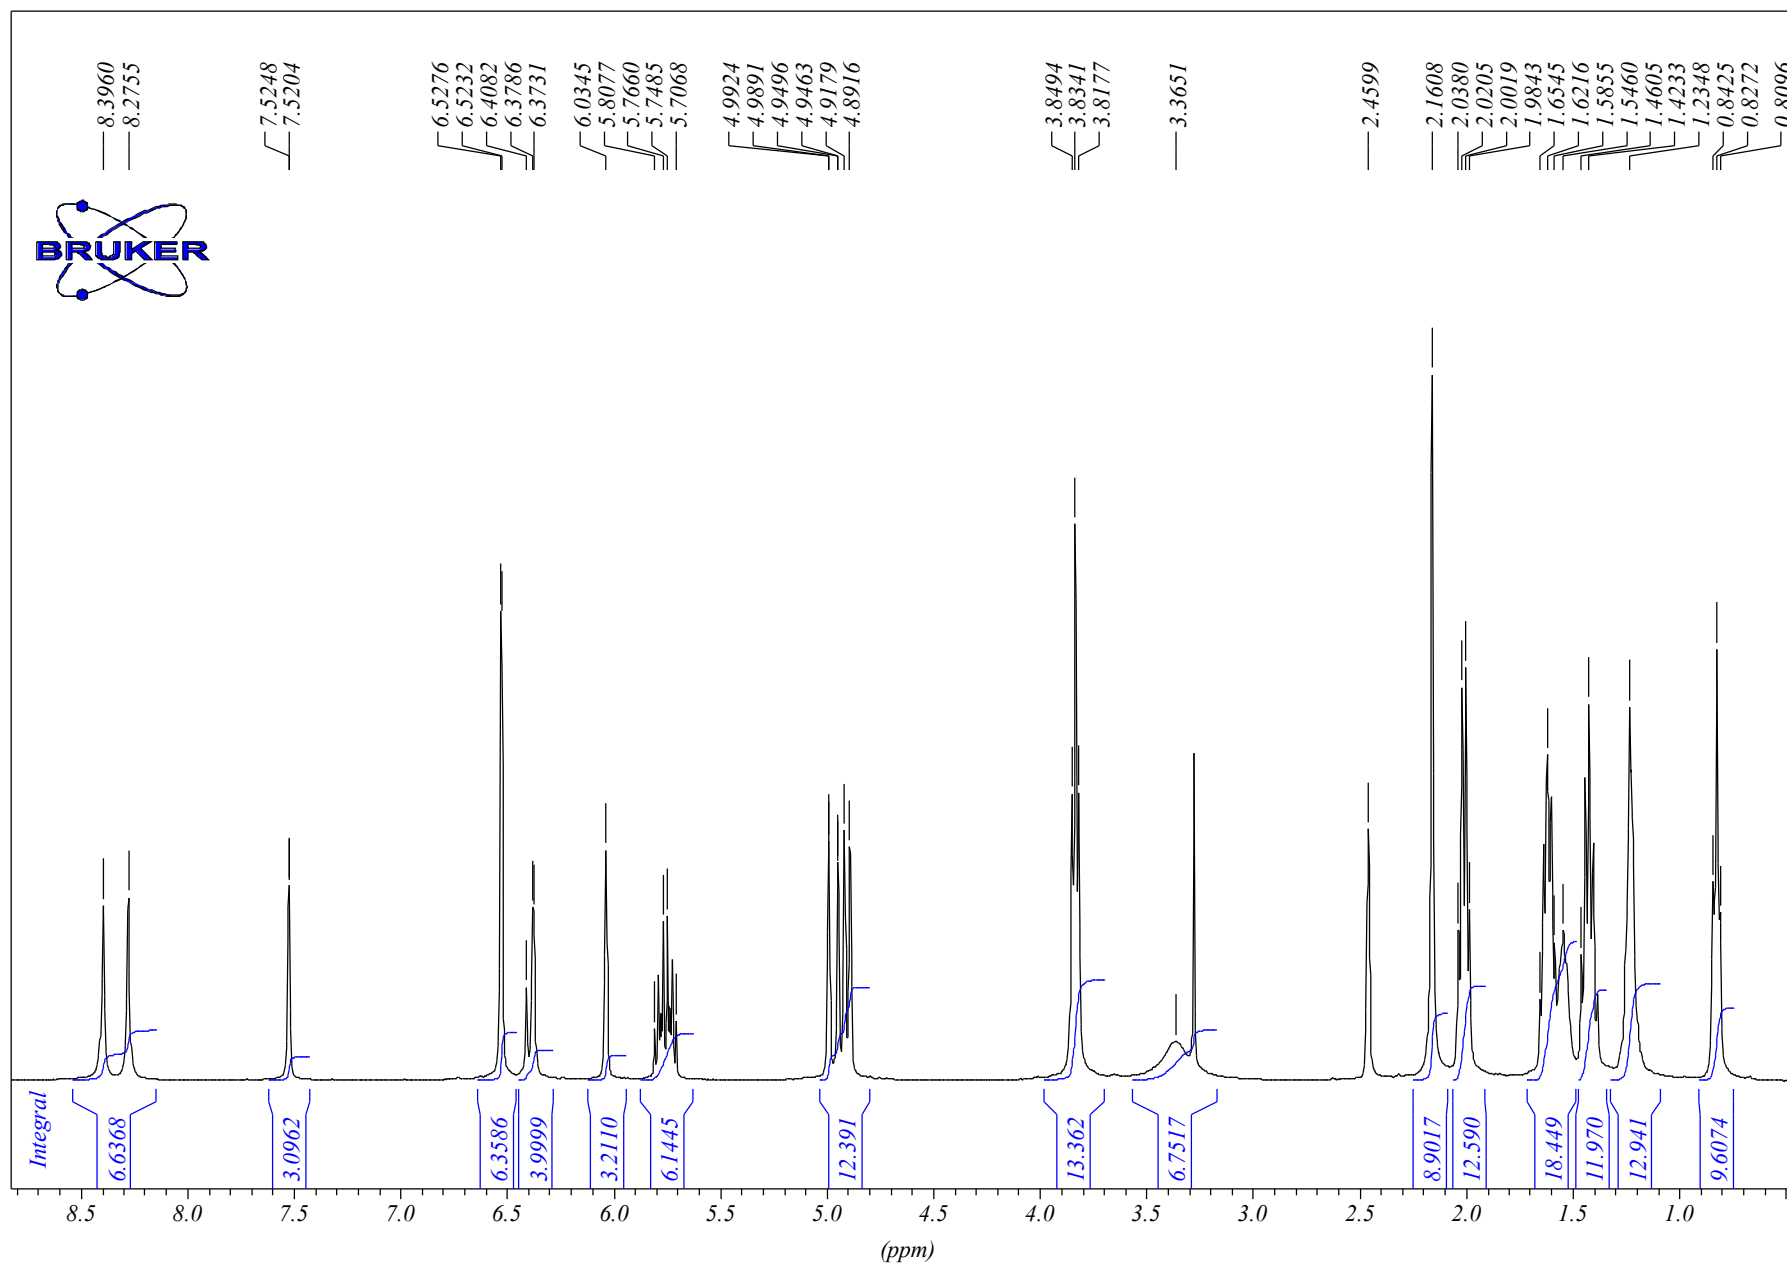

Figure S9. <sup>1</sup>H NMR spectrum of **3e** in DMSO-d<sub>6</sub>.

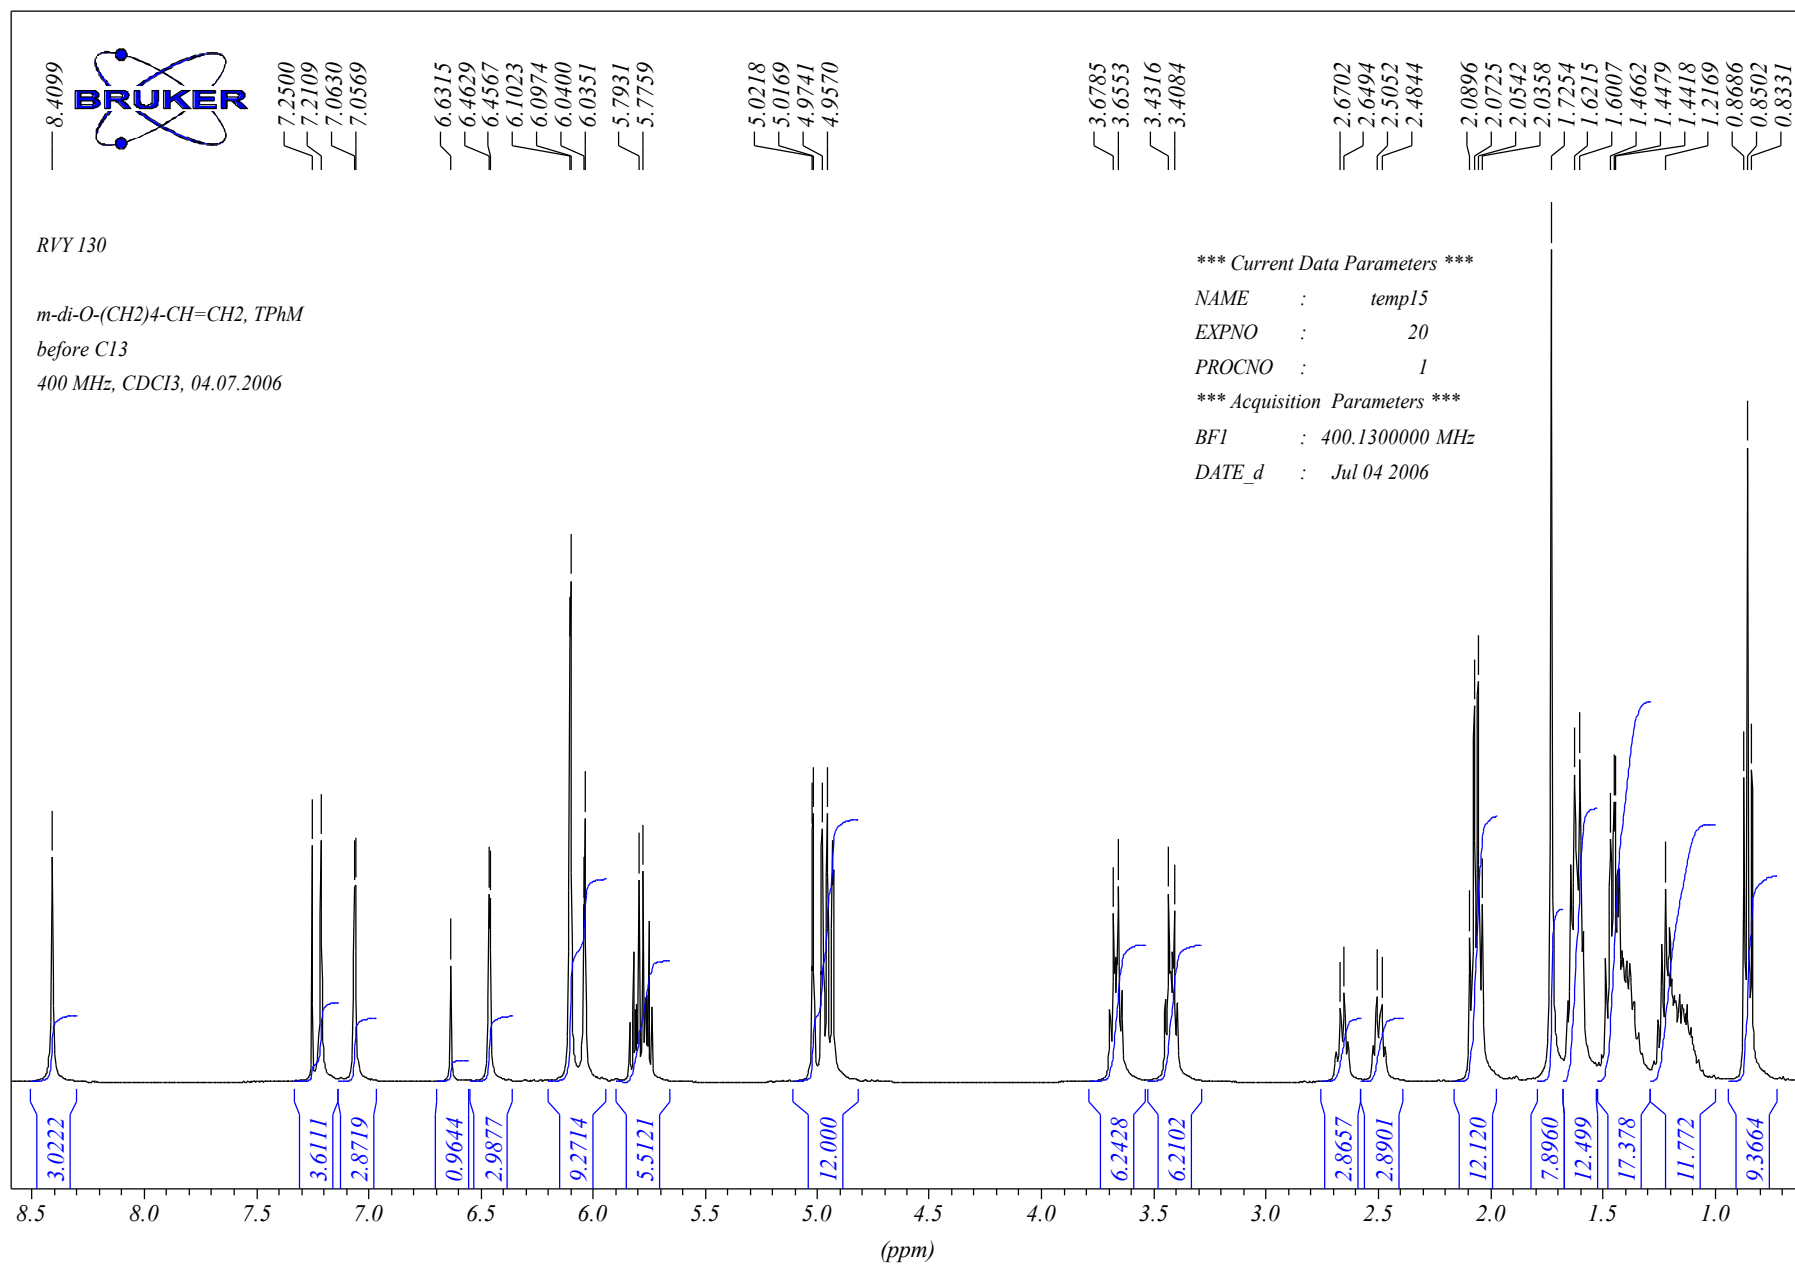

Figure S10. <sup>1</sup>H NMR spectrum of **3e** in CDCl<sub>3</sub>.
